# Supplementary material
Source: PubMed Central journal article supplement (PMC9346023)

sFigure 1a

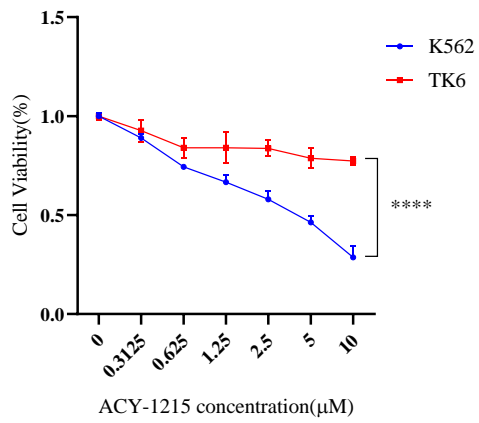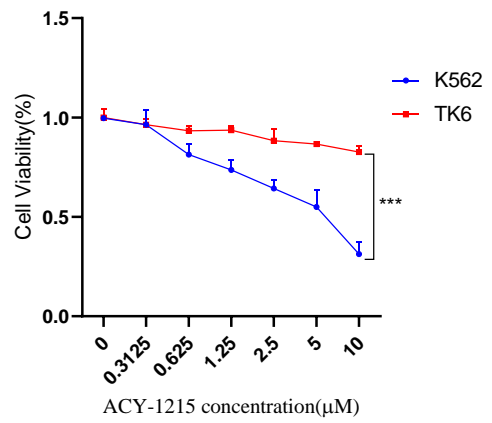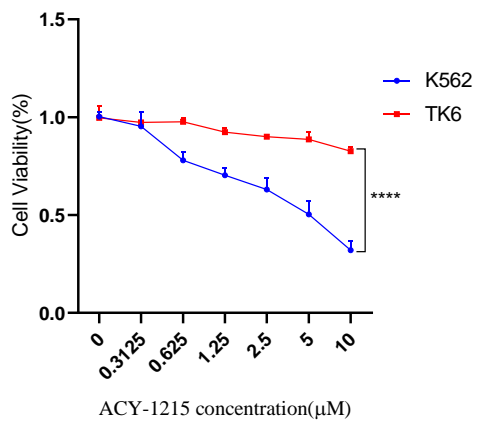

sFigure 1b

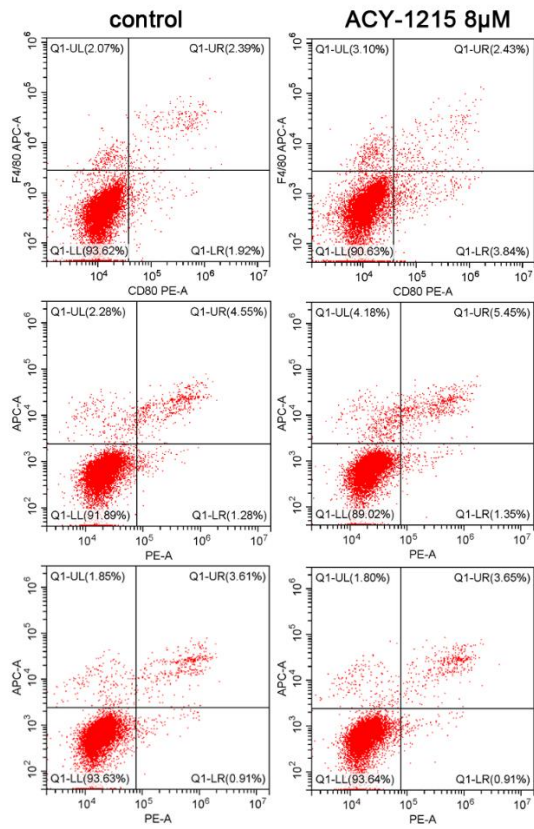

sFigure 2

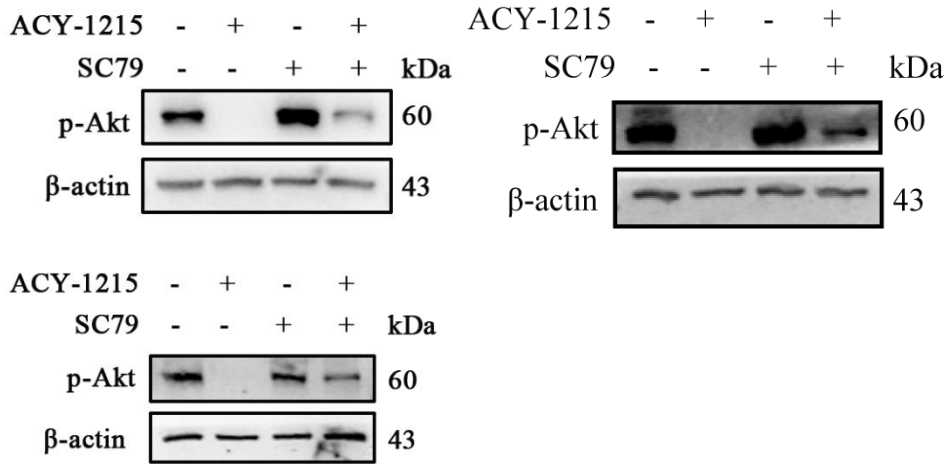

Supplement: 12192_2022_1280_MOESM1_ESM.pdf [file 12192_2022_1280_MOESM1_ESM.pdf]
